# Supplementary material for: The role of the Eu3+/Eu2+ redox-pair in the electrical properties of Sr2EuNb1−xTixO6−δ oxides
Source: Royal Society of Chemistry journal article supplement (doi:10.1039/c2jm33427e), 2012-01-01
Supplement: c2jm33427e.pdf [file c2jm33427e.pdf]

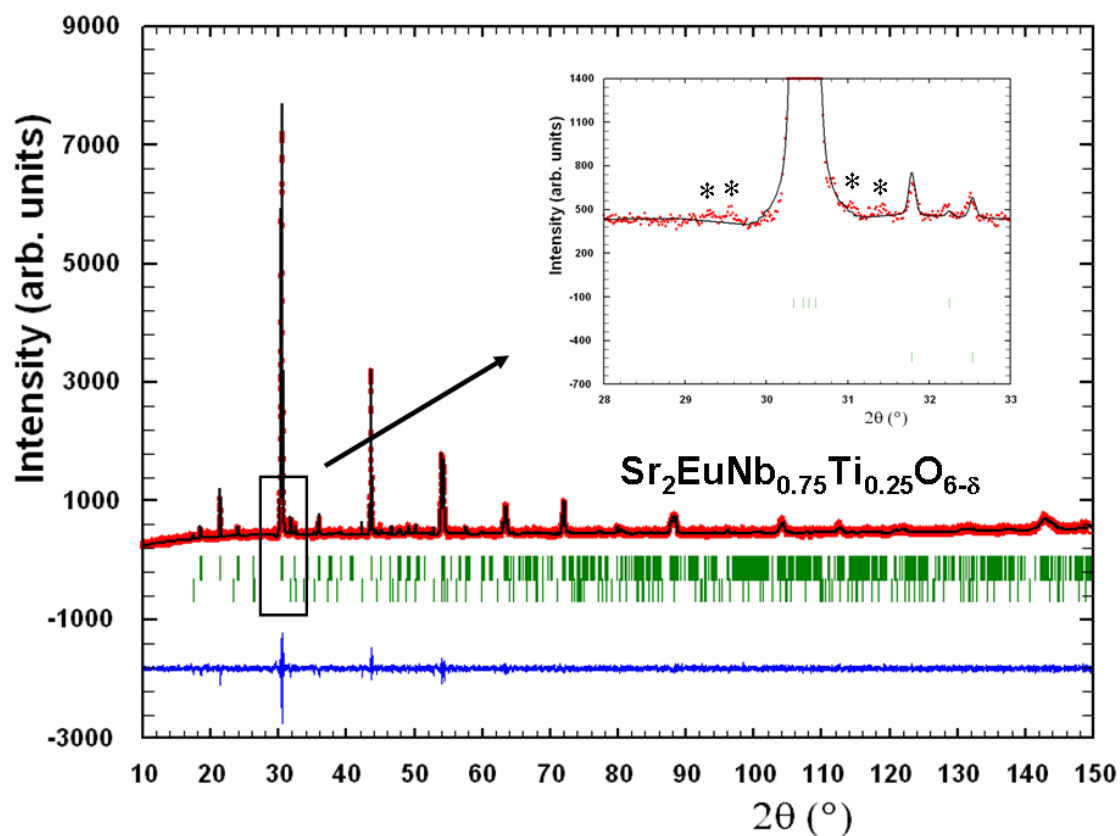

**Figure SI 1.** Experimental (red points), calculated (black solid line) and their difference (blue line at bottom) XRD patterns for  $\text{Sr}_2\text{EuNb}_{1-x}\text{Ti}_x\text{O}_{6-x/2}$  with  $x=0.25$ ; the vertical bars indicate the positions of Bragg peaks for this phase (upper bars) and for  $\text{Sr}_3\text{Ti}_2\text{O}_7$  (lower bars). In the zoomed region weak peaks of an unidentified impurity phase are indicated by asterisks.

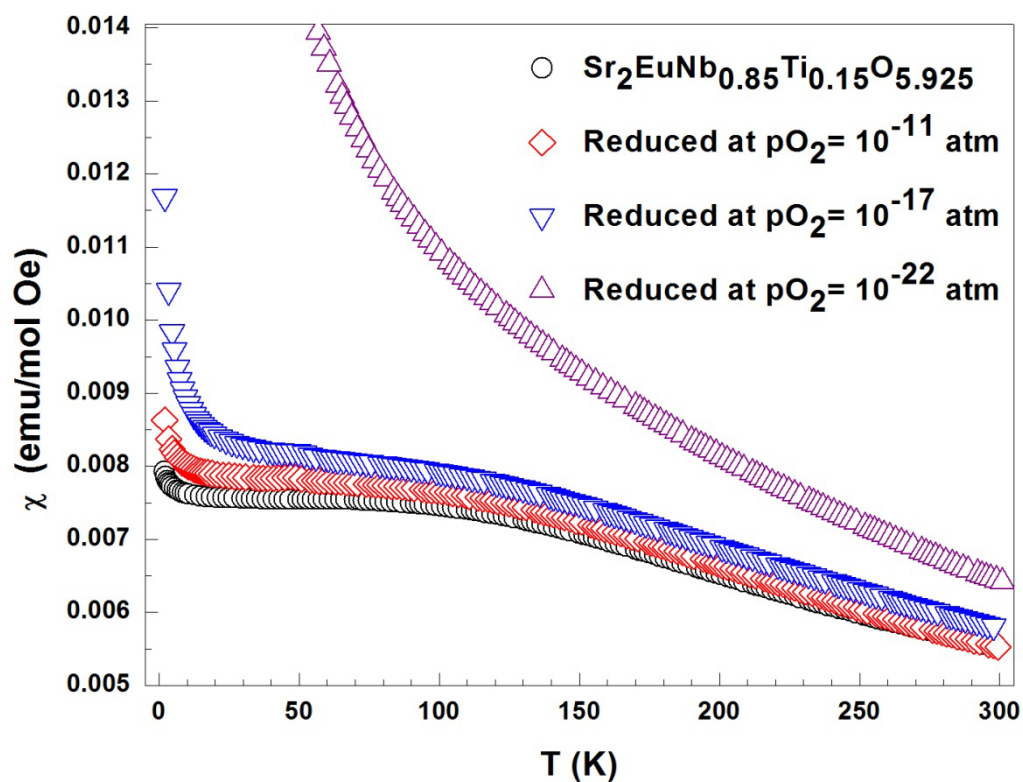

**Figure SI 2.** Magnetic susceptibility as a function of temperature for as-prepared  $\text{Sr}_2\text{EuNb}_{0.85}\text{Ti}_{0.15}\text{O}_{5.925}$  and samples reduced under different  $p\text{O}_2$  conditions. As the  $p\text{O}_2$  decreases the magnetic susceptibility increases due to the consequent higher  $\text{Eu}^{2+}$  content in the material.

**Table SI 1: Structural parameters for Sr<sub>2</sub>EuNb<sub>1-x</sub>Ti<sub>x</sub>O<sub>6-x/2</sub> (0 ≤ x ≤ 0.20) compounds obtained from XRD.**

|                              | <sup>a</sup> Sr <sub>2</sub> EuNbO <sub>6</sub> | <sup>b</sup> Sr <sub>2</sub> EuNb <sub>0.95</sub> Ti <sub>0.05</sub> O <sub>6</sub> | <sup>c</sup> Sr <sub>2</sub> EuNb <sub>0.90</sub> Ti <sub>0.10</sub> O <sub>6</sub> | <sup>d</sup> Sr <sub>2</sub> EuNb <sub>0.85</sub> Ti <sub>0.15</sub> O <sub>6</sub> | <sup>e</sup> Sr <sub>2</sub> EuNb <sub>0.80</sub> Ti <sub>0.20</sub> O <sub>6</sub> |
|------------------------------|-------------------------------------------------|-------------------------------------------------------------------------------------|-------------------------------------------------------------------------------------|-------------------------------------------------------------------------------------|-------------------------------------------------------------------------------------|
| <b>a (Å)</b>                 | 5.8438(2)                                       | 5.84134(5)                                                                          | 5.8385(3)                                                                           | 5.8383(4)                                                                           | 5.8393(1)                                                                           |
| <b>b (Å)</b>                 | 5.9255(2)                                       | 5.91717(5)                                                                          | 5.9028(3)                                                                           | 5.8973(4)                                                                           | 5.8920(1)                                                                           |
| <b>c (Å)</b>                 | 8.3072(3)                                       | 8.30257(7)                                                                          | 8.2956(5)                                                                           | 8.2895(5)                                                                           | 8.2873(1)                                                                           |
| <b>β (deg)</b>               | 90.216(2)                                       | 90.204(1)                                                                           | 90.198(4)                                                                           | 90.193(4)                                                                           | 90.183(1)                                                                           |
| <b>Sr position</b>           | 4e                                              | 4e                                                                                  | 4e                                                                                  | 4e                                                                                  | 4e                                                                                  |
| <b>Occ Sr</b>                | 1.00                                            | 1.00                                                                                | 1.00                                                                                | 1.00                                                                                | 1.00                                                                                |
| <b>x</b>                     | -0.005(2)                                       | -0.005(1)                                                                           | -0.002(3)                                                                           | -0.002(3)                                                                           | 0.007(2)                                                                            |
| <b>y</b>                     | 0.4654(6)                                       | 0.4657(4)                                                                           | 0.4701(6)                                                                           | 0.4712(8)                                                                           | 0.4736(6)                                                                           |
| <b>Z</b>                     | 0.2521(9)                                       | 0.2507(7)                                                                           | 0.251(1)                                                                            | 0.253(1)                                                                            | 0.249(1)                                                                            |
| <b>U*100 (Å<sup>2</sup>)</b> | 0.70(2)                                         | 0.21(2)                                                                             | 0.62(3)                                                                             | 0.76(4)                                                                             | 0.58(3)                                                                             |
| <b>Nb/Ti position</b>        | 2b                                              | 2b                                                                                  | 2b                                                                                  | 2b                                                                                  | 2b                                                                                  |
| <b>Occ Nb/Ti</b>             | 0.50/0.00                                       | 0.473(4)/0.027(4)                                                                   | 0.459(6)/0.041(6)                                                                   | 0.432(5)/0.068(5)                                                                   | 0.420(4)/0.080(4)                                                                   |
| <b>U*100 (Å<sup>2</sup>)</b> | 0.62(4)                                         | 0.35(3)                                                                             | 0.71(4)                                                                             | 0.68(5)                                                                             | 0.36(3)                                                                             |
| <b>Eu position</b>           | 2a                                              | 2a                                                                                  | 2a                                                                                  | 2a                                                                                  | 2a                                                                                  |
| <b>Occ Eu</b>                | 0.50                                            | 0.50                                                                                | 0.50                                                                                | 0.50                                                                                | 0.50                                                                                |
| <b>U*100 (Å<sup>2</sup>)</b> | 0.76(4)                                         | 0.28(3)                                                                             | 0.68(3)                                                                             | 0.73(4)                                                                             | 0.62(4)                                                                             |
| <b>O(1) position</b>         | 4e                                              | 4e                                                                                  | 4e                                                                                  | 4e                                                                                  | 4e                                                                                  |
| <b>X</b>                     | 0.075(4)                                        | 0.095(3)                                                                            | 0.093(5)                                                                            | 0.131(6)                                                                            | 0.104(5)                                                                            |
| <b>y</b>                     | 0.0378(4)                                       | 0.025(3)                                                                            | 0.036(5)                                                                            | 0.070(5)                                                                            | 0.037(6)                                                                            |
| <b>Z</b>                     | 0.261(4)                                        | 0.260(3)                                                                            | 0.269(7)                                                                            | 0.261(7)                                                                            | 0.294(6)                                                                            |
| <b>Occ</b>                   | 1.00                                            | 1.00                                                                                | 1.00                                                                                | 1.00                                                                                | 1.00                                                                                |
| <b>U*100 (Å<sup>2</sup>)</b> | 0.76(3)                                         | 0.53(3)                                                                             | 0.82(5)                                                                             | 0.84(4)                                                                             | 0.72(4)                                                                             |
| <b>O(2) position</b>         | 4e                                              | 4e                                                                                  | 4e                                                                                  | 4e                                                                                  | 4e                                                                                  |
| <b>X</b>                     | 0.235(6)                                        | 0.231(4)                                                                            | 0.236(7)                                                                            | 0.325(7)                                                                            | 0.222(5)                                                                            |
| <b>y</b>                     | 0.308(5)                                        | 0.312(3)                                                                            | 0.303(7)                                                                            | 0.308(7)                                                                            | 0.314(6)                                                                            |
| <b>Z</b>                     | -0.034(5)                                       | -0.035(4)                                                                           | 0.021(6)                                                                            | 0.024(6)                                                                            | -0.033(5)                                                                           |
| <b>Occ</b>                   | 1.00                                            | 1.00                                                                                | 1.00                                                                                | 1.00                                                                                | 1.00                                                                                |
| <b>U*100 (Å<sup>2</sup>)</b> | 0.76(3)                                         | 0.53(3)                                                                             | 0.82(5)                                                                             | 0.84(4)                                                                             | 0.72(4)                                                                             |
| <b>O(3) position</b>         | 4e                                              | 4e                                                                                  | 4e                                                                                  | 4e                                                                                  | 4e                                                                                  |
| <b>X</b>                     | 0.293(5)                                        | 0.291(4)                                                                            | 0.286(5)                                                                            | 0.245(7)                                                                            | 0.308(6)                                                                            |
| <b>y</b>                     | 0.757(5)                                        | 0.776(4)                                                                            | 0.773(6)                                                                            | 0.747(8)                                                                            | 0.793(6)                                                                            |
| <b>Z</b>                     | -0.063(4)                                       | -0.044(4)                                                                           | -0.084(5)                                                                           | -0.057(5)                                                                           | -0.061(6)                                                                           |
| <b>Occ</b>                   | 1.00                                            | 1.00                                                                                | 1.00                                                                                | 1.00                                                                                | 1.00                                                                                |
| <b>U*100 (Å<sup>2</sup>)</b> | 0.76(3)                                         | 0.53(3)                                                                             | 0.82(5)                                                                             | 0.84(4)                                                                             | 0.72(4)                                                                             |

Space Group: P2<sub>1</sub>/n (#14): 2a(000), 2b (00½), 4e (xyz),

<sup>a</sup>χ<sup>2</sup>= 1.08, R<sub>wp</sub>= 5.14%, R<sub>exp</sub>= 4.96%, R<sub>B</sub>= 3.10%, Composition: Sr<sub>2</sub>EuNbTiO<sub>6</sub>

<sup>b</sup>χ<sup>2</sup>= 1.47, R<sub>wp</sub>= 4.49%, R<sub>exp</sub>= 3.70%, R<sub>B</sub>= 5.10%, Composition: Sr<sub>2</sub>EuNb<sub>0.95(2)</sub>Ti<sub>0.05(2)</sub>O<sub>6</sub>

<sup>c</sup>χ<sup>2</sup>= 1.11, R<sub>wp</sub>= 6.33%, R<sub>exp</sub>= 6.01%, R<sub>B</sub>= 5.57%, Composition: Sr<sub>2</sub>EuNb<sub>0.92(2)</sub>Ti<sub>0.08(2)</sub>O<sub>6</sub>

<sup>d</sup>χ<sup>2</sup>= 1.18, R<sub>wp</sub>= 6.17%, R<sub>exp</sub>= 5.71%, R<sub>B</sub>= 5.68%, Composition: Sr<sub>2</sub>EuNb<sub>0.86(2)</sub>Ti<sub>0.14(2)</sub>O<sub>6</sub>

<sup>e</sup>χ<sup>2</sup>= 1.42, R<sub>wp</sub>= 5.82%, R<sub>exp</sub>= 4.88%, R<sub>B</sub>= 8.52%, Composition: Sr<sub>2</sub>EuNb<sub>0.84(2)</sub>Ti<sub>0.16(2)</sub>O<sub>6</sub>. Some Sr<sub>3</sub>Ti<sub>2</sub>O<sub>7</sub> is also present.

**Table SI 2: Selected structural information for as prepared  $\text{Sr}_2\text{EuNb}_{1-x}\text{Ti}_x\text{O}_6$  ( $0 \leq x \leq 0.15$ )**

|                                   | $\text{Sr}_2\text{EuNbO}_6$ | $\text{Sr}_2\text{EuNb}_{0.95}\text{Ti}_{0.05}\text{O}_6$ | $\text{Sr}_2\text{EuNb}_{0.90}\text{Ti}_{0.10}\text{O}_6$ | $\text{Sr}_2\text{EuNb}_{0.85}\text{Ti}_{0.15}\text{O}_6$ |
|-----------------------------------|-----------------------------|-----------------------------------------------------------|-----------------------------------------------------------|-----------------------------------------------------------|
| <sup>a</sup> Tilt angle $\theta$  | 16.5(6)                     | 12.5(5)                                                   | 13.8(6)                                                   | 14.7(6)                                                   |
| <sup>b</sup> Tilt angle $\varphi$ | 13.5(5)                     | 12.2(5)                                                   | 11.2(5)                                                   | 11.5(6)                                                   |
| <sup>c</sup> Tilt angle $\mu$     | 12.2(5)                     | 15.5(6)                                                   | 15.1(5)                                                   | 22.0(6)                                                   |
| Tolerance factor                  | 0.9156                      | 0.9160                                                    | 0.9164                                                    | 0.9168                                                    |
| <sup>d</sup> B'-O(1) x 2          | 2.09(2)                     | 2.08(2)                                                   | 2.05(2)                                                   | 2.13(2)                                                   |
| B'-O(2) x 2                       | 1.96(2)                     | 1.95(2)                                                   | 1.97(2)                                                   | 1.83(2)                                                   |
| B'-O(3) x 2                       | 2.00(2)                     | 2.07(2)                                                   | 2.01(2)                                                   | 1.93(2)                                                   |
| Average B'-O                      | 2.02(1)                     | 2.03(1)                                                   | 2.01(1)                                                   | 1.96(1)                                                   |
| <sup>d</sup> B''-O(1) x 2         | 2.16(2)                     | 2.23(2)                                                   | 2.25(2)                                                   | 2.33(2)                                                   |
| B''-O(2) x 2                      | 2.32(2)                     | 2.31(2)                                                   | 2.26(2)                                                   | 2.40(2)                                                   |
| B''-O(3) x 2                      | 2.34(2)                     | 2.19(2)                                                   | 2.27(2)                                                   | 2.36(2)                                                   |
| Average B''-O                     | 2.27(1)                     | 2.24(1)                                                   | 2.26(1)                                                   | 2.36(1)                                                   |

<sup>a</sup> B' = Nb/Ti, B'' = Eu

<sup>b</sup> With [110];  $\theta = \frac{1}{2}$  [180-angle<B'-O(3)-B''>]

<sup>c</sup> With [1-10];  $\varphi = \frac{1}{2}$  [180-angle<B'-O(2)-B''>]

<sup>d</sup> With [001];  $\mu = \frac{1}{2}$  [180-angle<B'-O(1)-B''>]
